# Supplementary material for: Torus Mandibularis in Patients Receiving Hemodialysis
Source: MDPI journal article supplement (doi:10.3390/ijerph18189451), 2021-09-07
Supplement: s1 [file s1]

**Table S1.** Prevalence rates of torus mandibularis reported in the medical literature.

| Author(s)                | Publication Year | Geographic Location | Sample Size | Patient Group                   | Prevalence Rate |
|--------------------------|------------------|---------------------|-------------|---------------------------------|-----------------|
| Reichart et al [21]      | 1988             | German              | 1317        | Nonuremic                       | 5.2             |
| Reichart et al [21]      | 1988             | Thailand            | 947         | Nonuremic                       | 9.2             |
| Shah et al [25]          | 1992             | India               | 1000        | Nonuremic                       | 1.4             |
| Ruprecht et al [26]      | 2000             | United States       | 1600        | Nonuremic                       | 16.9            |
| Bruce et al [27]         | 2004             | Ghana               | 926         | Nonuremic                       | 12.1            |
| Jainkittivong et al [24] | 2007             | Thailand            | 1520        | Nonuremic                       | 32.2            |
| Sawair et al [28]        | 2009             | Jordan              | 618         | Nonuremic                       | 25.7            |
| Simunkovic et al [29]    | 2011             | Croatia             | 1679        | Nonuremic                       | 12.6            |
| Hiremath et al [30]      | 2011             | Malaysia            | 65          | Nonuremic                       | 4.6             |
| Chiang et al [31]        | 2014             | Taiwan              | 2050        | Nonuremic                       | 24.2            |
| Yoshinaka et al [32]     | 2014             | Japan               | 664         | Nonuremic                       | 29.7            |
| Chao et al [18]          | 2015             | Taiwan              | 119         | Uremic (hemodialysis)           | 6.7             |
| Hsu et al [39]           | 2016             | Taiwan              | 134         | Uremic<br>(peritoneal dialysis) | 5.3             |
| AlZarea [33]             | 2016             | Saudi Arabia        | 847         | Nonuremic                       | 9.8             |
| Scriciu et al [38]       | 2016             | Romania             | 74          | Nonuremic                       | 9.5             |
| Maduakor and Nwoga [34]  | 2017             | Nigeria             | 292         | Nonuremic                       | 56.8            |
| Morita et al [35]        | 2017             | Japan               | 204         | Nonuremic                       | 58.3            |
| Kumar Singh et al [36]   | 2017             | Malaysia            | 2666        | Nonuremic                       | 10.5            |
| Telang et al [37]        | 2019             | Malaysia            | 4443        | Nonuremic                       | 0.9             |
| Present study            | 2021             | Taiwan              | 322         | Uremic (hemodialysis)           | 7.8             |
